# Supplementary material for: Intensity of Nosema ceranae infection is associated with specific honey bee gut bacteria and weakly associated with gut microbiome structure
Source: PubMed Central journal article supplement (PMC6405881; doi:10.1038/s41598-019-40347-6), 2019-03-07
Supplement: 41598_2019_40347_MOESM1_ESM.pdf [file 41598_2019_40347_MOESM1_ESM.pdf]

**SUPPLEMENTARY INFORMATION FOR:**

**Intensity of *Nosema ceranae* infection is associated with specific honey bee gut bacteria  
and weakly associated with overall gut microbiome structure**

Andrey Rubanov<sup>1</sup>, Kaleigh A. Russell<sup>2</sup>, Jason A. Rothman<sup>3</sup>, James C. Nieh<sup>1\*</sup>, and Quinn S.  
McFrederick<sup>2,3\*</sup>

\*Corresponding authors:

[jnieh@ucsd.edu](mailto:jnieh@ucsd.edu)

[quinn.mcfrederick@ucr.edu](mailto:quinn.mcfrederick@ucr.edu)

<sup>1</sup>UCSD  
Division of Biological Sciences  
Section of Ecology, Behavior, and Evolution  
9500 Gilman Drive, MC0116  
La Jolla, CA 92093-0116  
USA

<sup>2</sup>University of California, Riverside  
Department of Entomology  
900 University Avenue  
Riverside, CA 92521

<sup>3</sup>University of California, Riverside  
Microbiology Graduate Program  
900 University Avenue  
Riverside, CA 92521

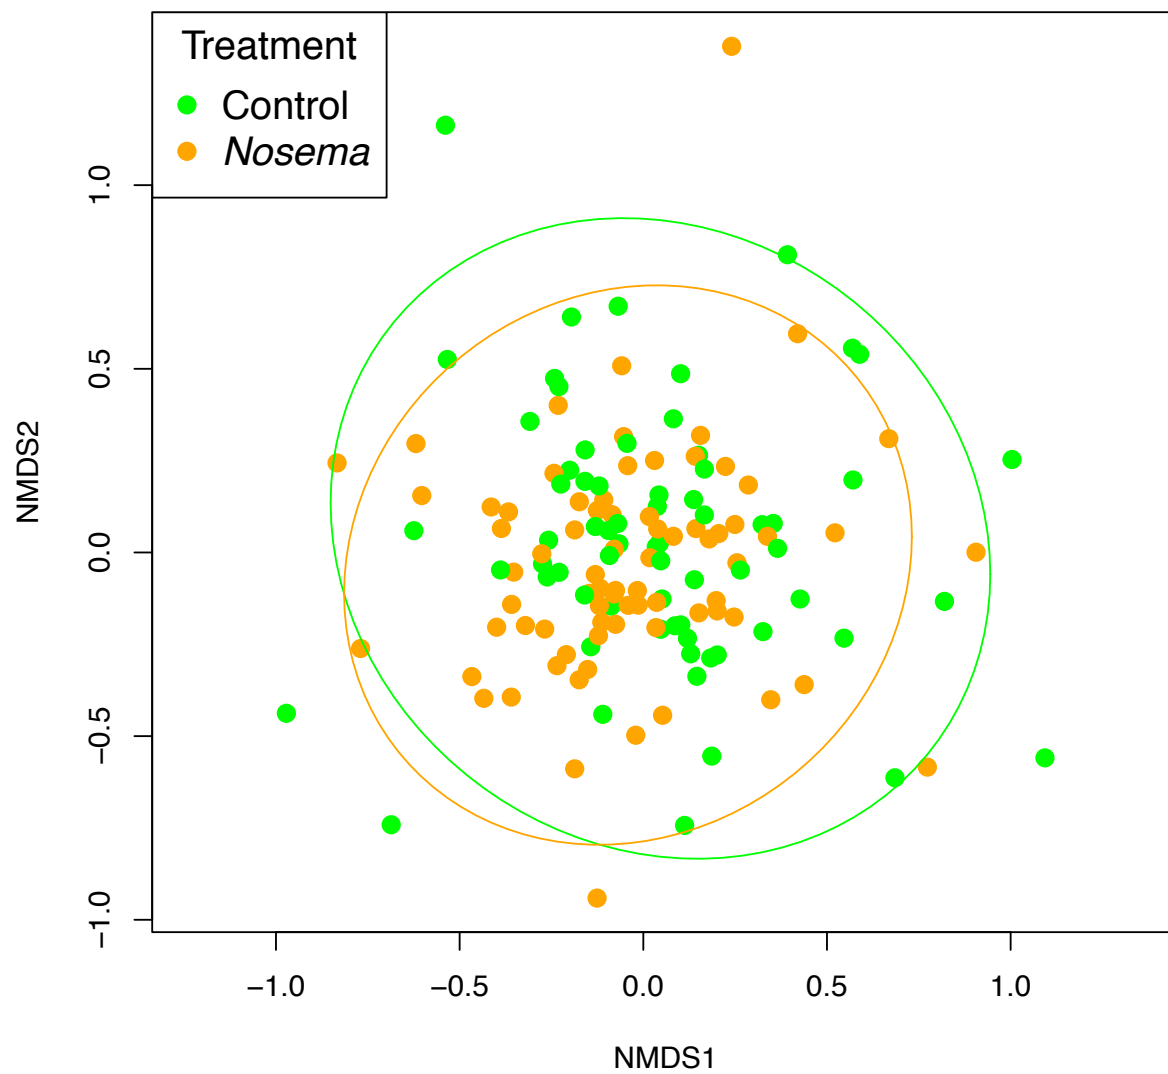

Fig. S1. NMDS ordination of Bray-Curtis distances of gut microbiota composition showed no significant difference in control versus infected bees (Adonis  $F_{1,142} = 0.91$ ,  $P = 0.56$ ).

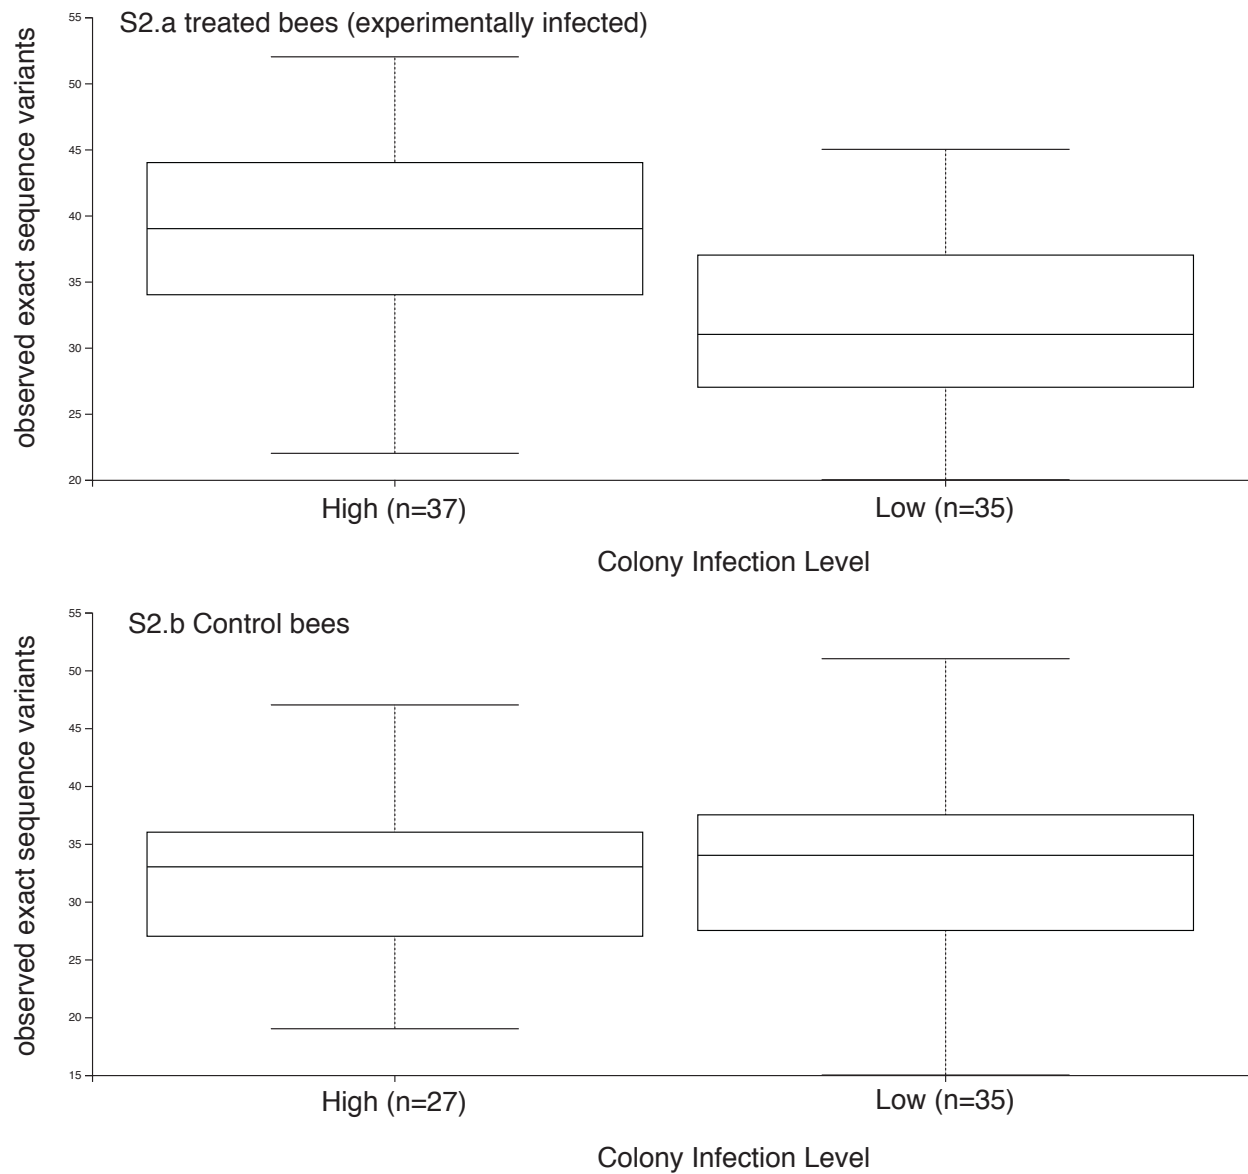

Fig. S2. For *Nosema* treated samples, high infection level colonies exhibited more ESVs per sample compared to low infection colonies (Fig. S2.a, Kruskal-Wallis  $H_{71} = 12.07$ ,  $P < 0.0006$ ). For control bees alpha diversity did not differ between high and low infection level colonies (Fig. S2.b, Kruskal-Wallis  $H_{64} = 0.12$ ,  $P = 0.75$ ).

### S2.A *Nosema ceranae*

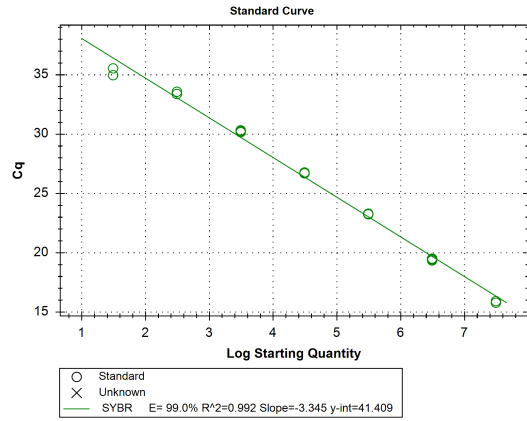

### S2.B Host actin

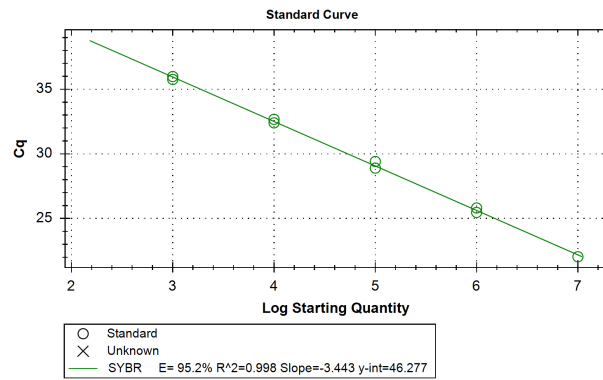

Fig. S3. Example standard curves showing qPCR amplification efficiency (calculated by the BioRad CFX manager software). All efficiencies ranged between 90-110% with most in the mid 90% range.
